# Supplementary material
Source: publisher figshare collection journal article supplement (https://acs.figshare.com/ndownloader/files/4575781)
Supplement: Supplementary file 1 [file 4575781]

## SUPPORTING INFORMATION

### A New Synthesis of Difluorodiazirine and the Absolute Reactivity of Difluorocarbene

Robert A. Moss,\* Lei Wang, Christopher Skalit, and Karsten Krogh-Jespersen\*

*Department of Chemistry and Chemical Biology, Rutgers, The State University of New Jersey, New Brunswick, New Jersey 08903*

| Contents                                                                                                              | Page |
|-----------------------------------------------------------------------------------------------------------------------|------|
| Preparation of difluorodiazirine                                                                                      | S-2  |
| Scheme S-1                                                                                                            | S-3  |
| UV spectrum of difluorodiazirine                                                                                      | S-3  |
| Table S-1                                                                                                             | S-4  |
| Spectra of difluorocarbene ylides                                                                                     | S-4  |
| CF <sub>2</sub> + cyclohexene, Figs. S-5 – S-16                                                                       | S-6  |
| CF <sub>2</sub> + TME, Figs. S-17-S – S-28                                                                            | S-8  |
| Additional rate constant determinations                                                                               | S-10 |
| Computational details                                                                                                 | S-11 |
| Optimized ground state cartesian geometries, absolute energies, and excited state transition energies and intensities | S-12 |

**Preparation of difluorodiazirine (4).** A 25-mL flask with a tall neck bearing a side exit tube, and fitted with a pressure-equalized addition funnel and a magnetic stirring bar, was charged with a suspension of 3.0 g (71 mmol) of anhydrous LiF (Acros, used as supplied) and 1.8 g (8.0 mmol) of 15-crown-5 (Aldrich, used as supplied) in 8 mL of HMPA (Aldrich: 100 g of HMPA were dried over a mixture of 5 g of 4A molecular sieves and 10 g of 13X molecular sieves for at least a week before use.<sup>1)</sup> The side exit tube was connected to the inlet of a trap that contained 1.5 mL of pentane. The trap was fitted with stopcocks at both inlet and outlet, and was cooled by liquid nitrogen. Then, 200 mg of 2,4-dinitrophenoxyfluorodiazirine,<sup>2</sup> dissolved in 5 mL of dry HMPA was transferred to the addition funnel. The trap outlet was connected to a vacuum manifold and the reaction train was evacuated to 1 Torr. The reaction flask was heated to 55 °C in an oil bath. When the temperature reached 55 °C, the diazirine solution was added slowly (15 min) to the stirred reaction mixture. Bubbling was observed in the reaction mixture, and its color changed from pale yellow to dark red. After completion of the addition, the reaction was continued for 20 minutes until no further effervescence was observed. Then, heating and stirring were discontinued, the outlet stopcock of the trap was closed, and nitrogen was admitted to the reaction system via the addition funnel until the systemic pressure reached atmospheric pressure. The inlet stopcock of the trap was closed and the trap was disconnected from the reaction train. An additional 1 mL of pentane was added to the trap via the stopcock, and the trap was then removed from the liquid nitrogen coolant with both stopcocks open. The contents of the trap melted as the trap warmed, and the contents were transferred to a storage flask while they were still cold.

We obtained 2.5 mL of a pentane solution of difluorodiazirine (DFD) with  $A_{356} = 1.0$ . The UV spectrum of DFD appears below in Figure S-1. DFD pentane solutions could be stored in the freezer or, for better preservation, in a Dewar flask over Dry Ice.

The contents of the reaction flask were analyzed by GC to obtain the ratio of 2,4-dinitrophenol (partner of DFD) to 2,4-dinitrofluorobenzene (partner of diazirinone). This ratio was found to be 3:1. Table S-1, below, summarizes the ratios obtained with LiF, KF, or NaF as fluoride sources in various DFD preparations.

(1) The quality of the HMPA is critical. “Poor” quality HMPA significantly reduces the yield of DFD and raises the baseline at 300 nm. This HMPA is characterized by UV absorption at 308 nm. “Good” quality HMPA displays a maximum at 270 nm and minimal absorption at 300 nm or higher.

(2) Experimental details for the preparation of 2,4-dinitrophenoxyfluorodiazirine from *N*-methanesulfonyloxy-*O*-phenylisourea are given in Moss, R.A.; Tian, J., Sauers, R.R.; Skalit, C.; Krogh-Jerspersen, K. *Org. Lett.* **2007**, 9, 4053, and its Supporting Information. A “complete” reaction scheme for the preparation of DFD appears below in Scheme S-1.

**Scheme S-1. Synthesis of Difluorodiazirine**

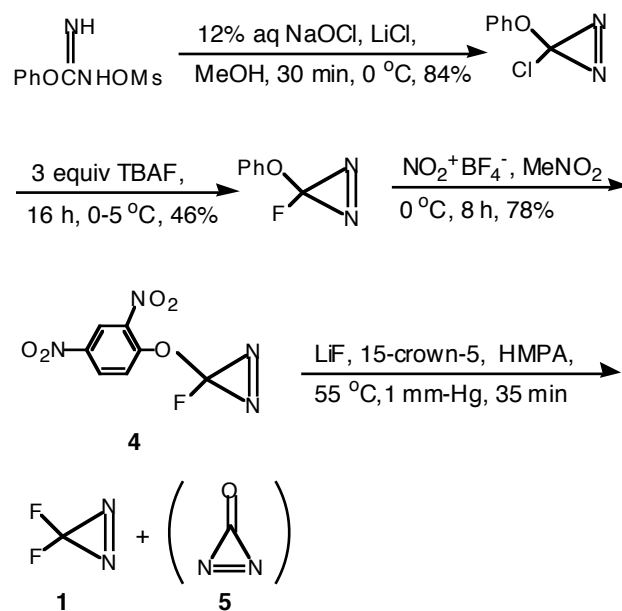

(This Scheme also appears in the Communication, designated Scheme 1.)

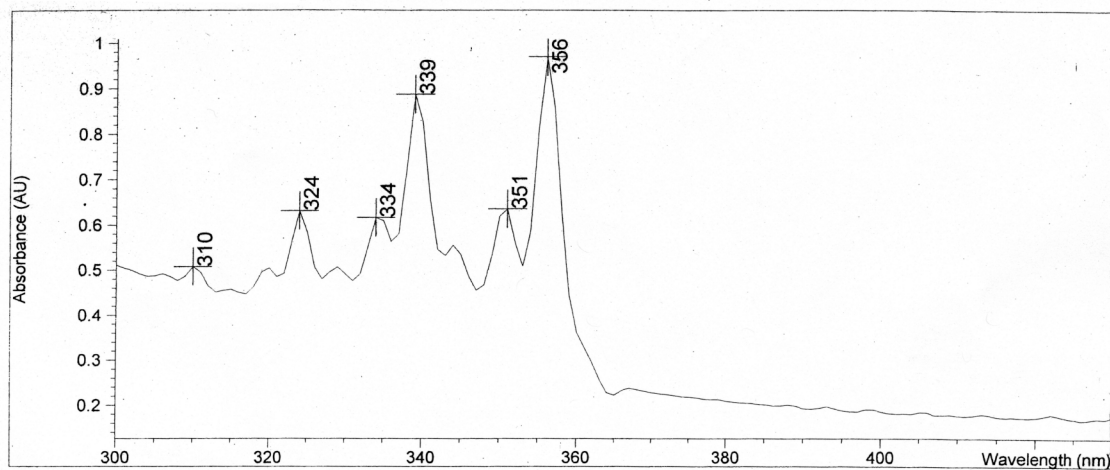

**Figure S-1.** UV spectrum of difluorodiazirine in pentane.

**Table S-1.** Product Ratios for Various Difluorodiazirine Preparations<sup>a</sup>

| Reagent                     | 2,4-Dinitrophenol:2,4-Dinitrofluorobenzene <sup>b</sup> |
|-----------------------------|---------------------------------------------------------|
| NaF/18-crown-6              | 1:2                                                     |
| NaF/15-crown-5              | 1:5                                                     |
| KF                          | 1:13.5                                                  |
| CsF/18-crown-6 <sup>c</sup> | <i>d</i>                                                |
| LiF/12-crown-4              | 1:2.7                                                   |
| LiF/15-crown-5              | 3:1                                                     |
| LiF/18-crown-6              | 1.1:1                                                   |

<sup>a</sup> The reactions were performed as described above, unless otherwise indicated. <sup>b</sup> Analyzed by GC (detector not calibrated): column: 30 m x 0.53 mm x 1.5  $\mu$ m (film thickness) 5% phenyl-methylsiloxane; temperature: 50 °C for 3 min, programmed to 260 °C at 30 °C/min. <sup>c</sup> The reaction was carried out at ambient temperature. <sup>d</sup> Only 2,4-dinitrofluorobenzene formed in this case.

### Spectra of Difluorocarbene Ylides

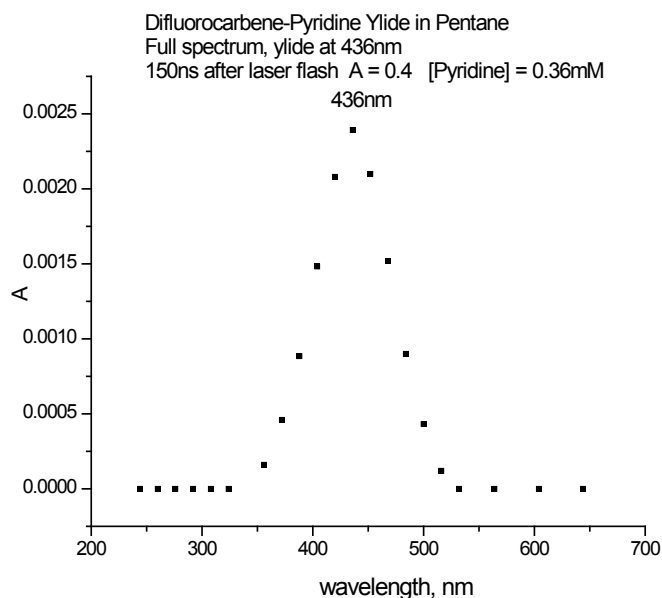

**Figure S-2.** LFP-UV spectrum of difluorocarbene-pyridine ylide (**8**) in pentane;  $\lambda_{\text{max}}$  at 436 nm.

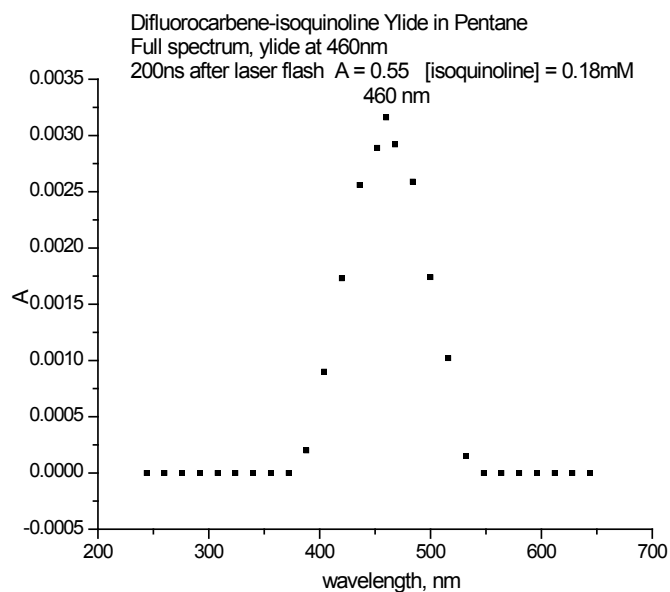

**Figure S-3.** LFP-UV spectrum of difluorocarbene-isoquinoline ylide (**9**) in pentane;  $\lambda_{\text{max}}$  at 460 nm.

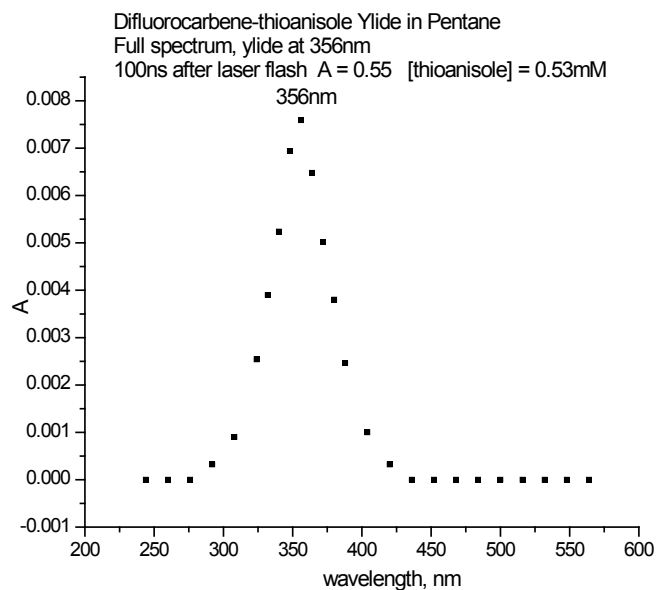

**Figure S-4.** LFP-UV spectrum of difluorocarbene-thioanisole ylide (**10**) in pentane;  $\lambda_{\text{max}}$  at 356 nm.

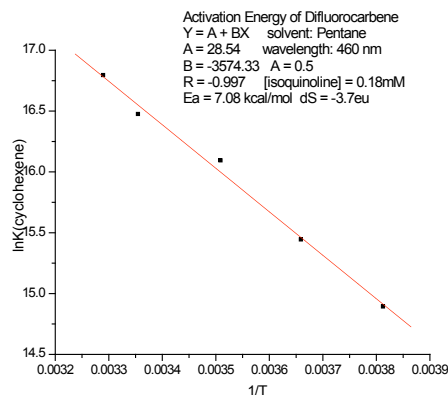

**Figure S-5.** Activation energy for addition of  $CF_2$  to cyclohexene:  $E_a = 7.08$  kcal/mol,  $A = 2.48 \exp 12 \text{ M}^{-1}\text{s}^{-1}$ ,  $R = -0.997$ .

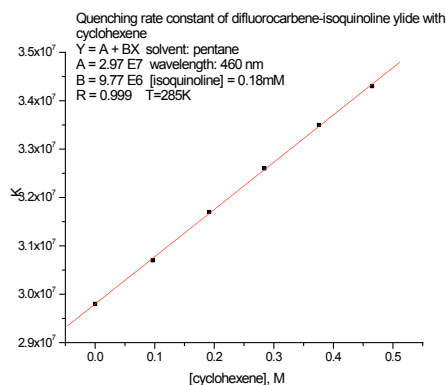

**Figure S-8.** Rate constant for addition of  $CF_2$  to cyclohexene at 285 K:  $k = 9.77 \exp 6 \text{ M}^{-1}\text{s}^{-1}$ ,  $R = 0.999$ .

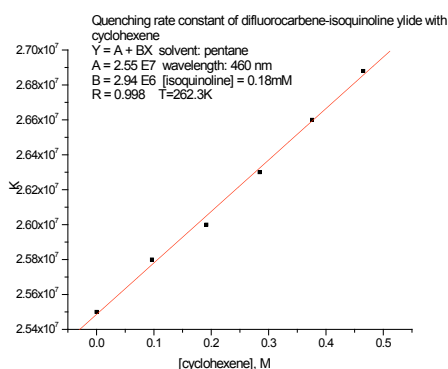

**Figure S-6.** Rate constant for addition of  $CF_2$  to cyclohexene at 262.3 K:  $k = 2.94 \exp 6 \text{ M}^{-1}\text{s}^{-1}$ ,  $R = 0.998$ .

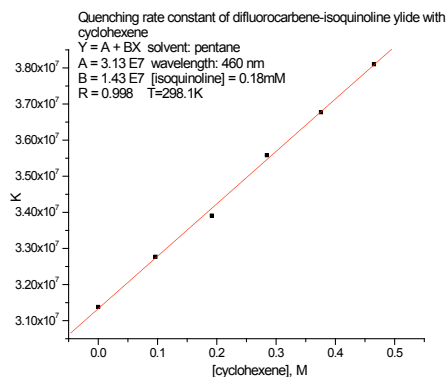

**Figure S-9.** Rate constant for addition of  $CF_2$  to cyclohexene at 298.1 K:  $k = 1.43 \exp 7 \text{ M}^{-1}\text{s}^{-1}$ ,  $R = 0.998$ .

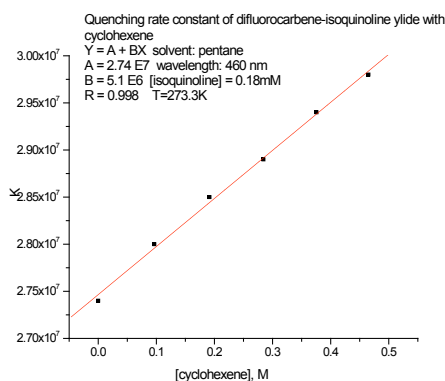

**Figure S-7.** Rate constant for addition of  $CF_2$  to cyclohexene at 273.3 K:  $k = 5.10 \exp 6 \text{ M}^{-1}\text{s}^{-1}$ ,  $R = 0.998$ .

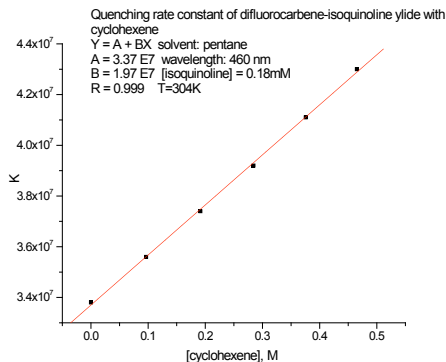

**Figure S-10.** Rate constant for addition of  $CF_2$  to cyclohexene at 304 K:  $k = 1.97 \exp 7 \text{ M}^{-1}\text{s}^{-1}$ ,  $R = 0.999$ .

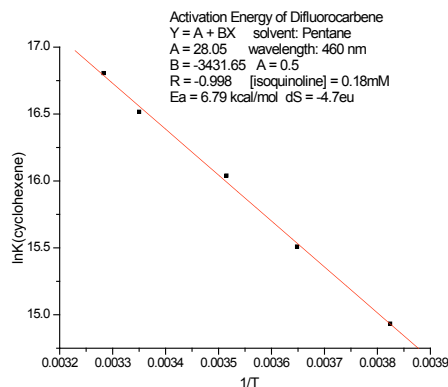

**Figure S-11.** Activation energy for addition of  $\text{CF}_2$  to cyclohexene:  $E_a = 6.79 \text{ kcal/mol}$ ,  $A = 1.52 \exp 12 \text{ M}^{-1}\text{s}^{-1}$ ,  $R = -0.998$ .

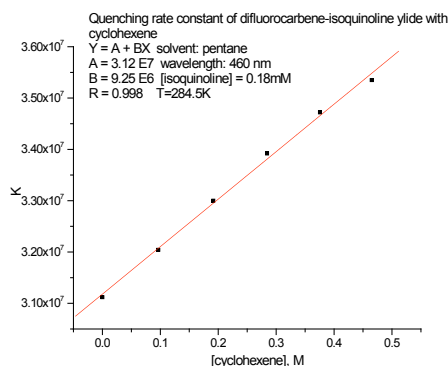

**Figure S-14.** Rate constant for addition of  $\text{CF}_2$  to cyclohexene at 284.5 K:  $k = 9.25 \exp 6 \text{ M}^{-1}\text{s}^{-1}$ ,  $R = 0.998$ .

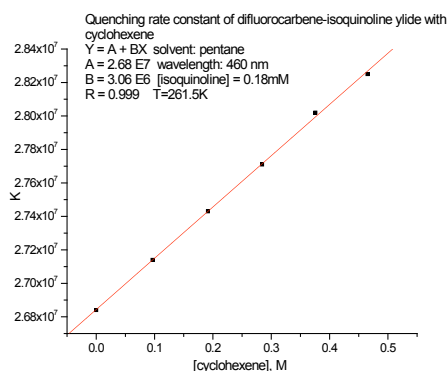

**Figure S-12.** Rate constant for addition of  $\text{CF}_2$  to cyclohexene at 261.5 K:  $k = 3.06 \exp 6 \text{ M}^{-1}\text{s}^{-1}$ ,  $R = 0.999$ .

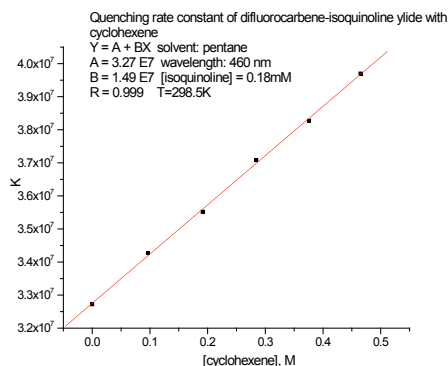

**Figure S-15.** Rate constant for addition of  $\text{CF}_2$  to cyclohexene at 298.5 K:  $k = 1.49 \exp 7 \text{ M}^{-1}\text{s}^{-1}$ ,  $R = 0.999$ .

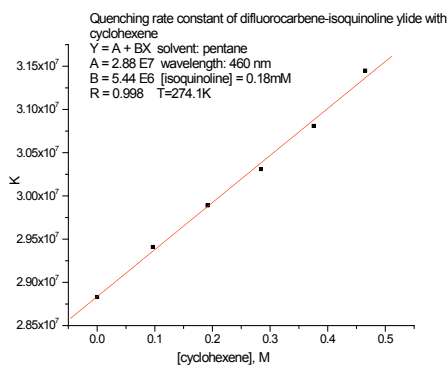

**Figure S-13.** Rate constant for addition of  $\text{CF}_2$  to cyclohexene at 274.1 K:  $k = 5.44 \exp 6 \text{ M}^{-1}\text{s}^{-1}$ ,  $R = 0.998$ .

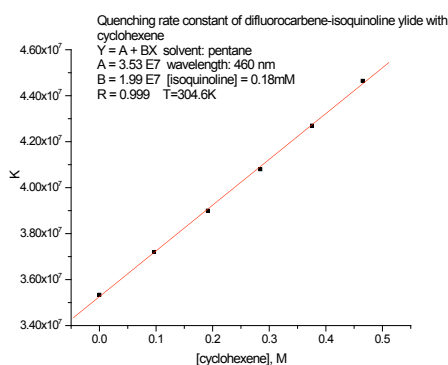

**Figure S-16.** Rate constant for addition of  $\text{CF}_2$  to cyclohexene at 304.6 K:  $k = 1.99 \exp 7 \text{ M}^{-1}\text{s}^{-1}$ ,  $R = 0.999$ .

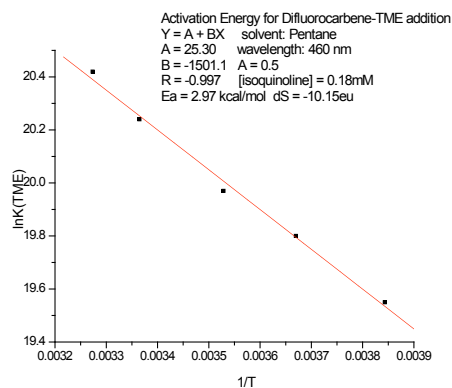

**Figure S-17.** Activation energy for addition of  $CF_2$  to TME:  $E_a = 2.97$  kcal/mol,  $A = 9.72 \exp 10 \text{ M}^{-1}\text{s}^{-1}$ ,  $R = -0.997$ .

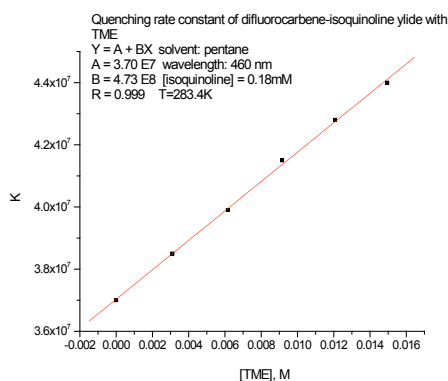

**Figure S-20.** Rate constant for addition of  $CF_2$  to TME at 283.4 K:  $k = 4.73 \exp 8 \text{ M}^{-1}\text{s}^{-1}$ ,  $R = 0.999$ .

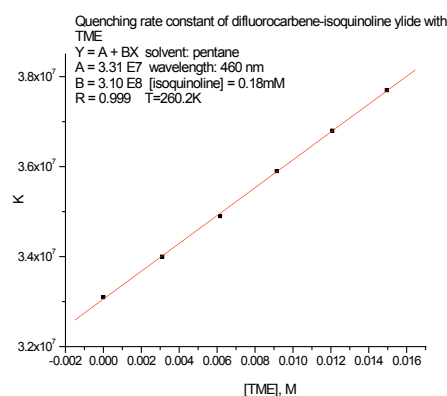

**Figure S-18.** Rate constant for addition of  $CF_2$  to TME at 260.2 K:  $k = 3.10 \exp 8 \text{ M}^{-1}\text{s}^{-1}$ ,  $R = 0.999$ .

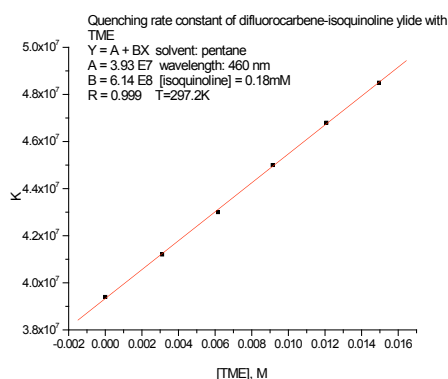

**Figure S-21.** Rate constant for addition of  $CF_2$  to TME at 297.2 K:  $k = 6.14 \exp 8 \text{ M}^{-1}\text{s}^{-1}$ ,  $R = 0.999$ .

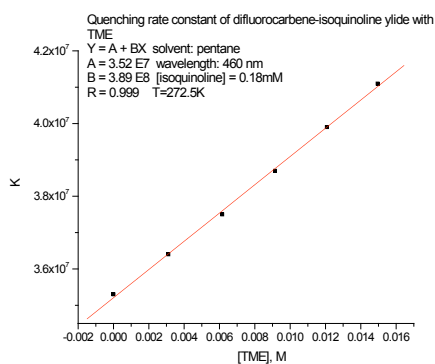

**Figure S-19.** Rate constant for addition of  $CF_2$  to TME at 272.5 K:  $k = 3.89 \exp 8 \text{ M}^{-1}\text{s}^{-1}$ ,  $R = 0.999$ .

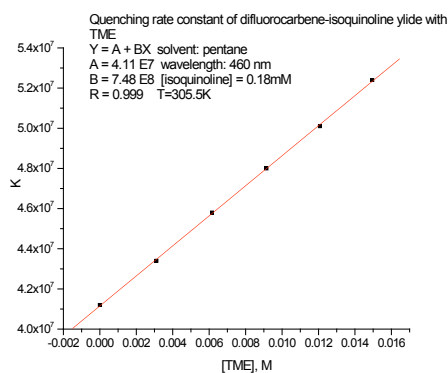

**Figure S-22.** Rate Constant for addition of  $CF_2$  to TME at 305.5 K:  $k = 7.48 \exp 8 \text{ M}^{-1}\text{s}^{-1}$ ,  $R = 0.999$ .



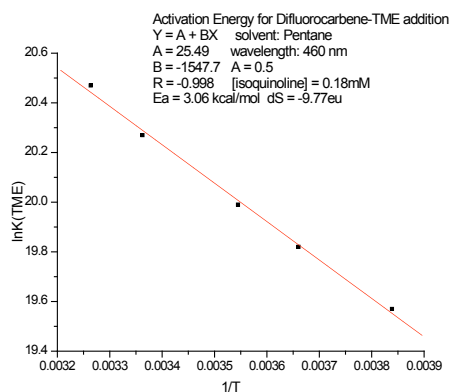

**Figure S-23.** Activation energy for addition of  $CF_2$  to TME;  $E_a = 3.06$  kcal/mol,  $A = 1.18 \exp 11 \text{ M}^{-1} \text{ s}^{-1}$ ,  $R = -0.998$ .

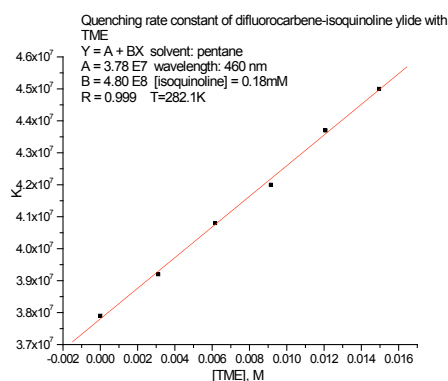

**Figure S-26.** Rate constant for addition of  $CF_2$  to TME at 282.1 K:  $k = 4.80 \exp 8 \text{ M}^{-1} \text{ s}^{-1}$ ,  $R = 0.999$ .

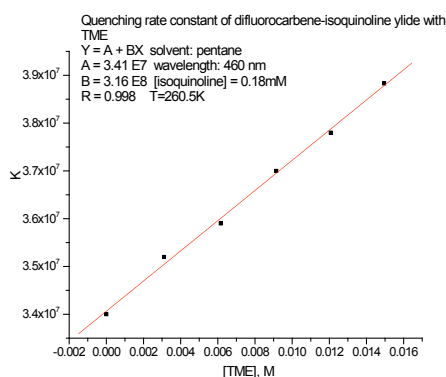

**Figure S-24.** Rate constant for addition of  $CF_2$  to TME at 260.5 K:  $k = 3.16 \exp 8 \text{ M}^{-1} \text{ s}^{-1}$ ,  $R = 0.998$ .

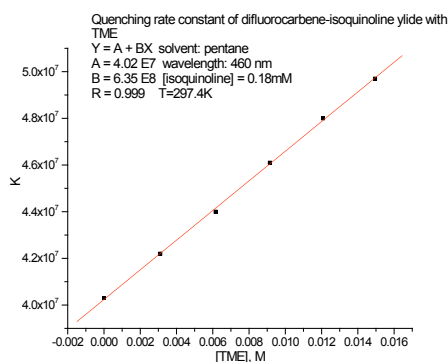

**Figure S-27.** Rate constant for addition of  $CF_2$  to TME at 297.4 K:  $k = 6.35 \exp 8 \text{ M}^{-1} \text{ s}^{-1}$ ,  $R = 0.999$ .

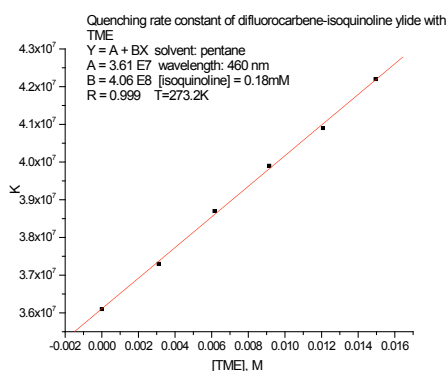

**Figure S-25.** Rate constant for addition of  $CF_2$  to TME at 273.2 K:  $k = 4.06 \exp 8 \text{ M}^{-1} \text{ s}^{-1}$ ,  $R = 0.999$ .

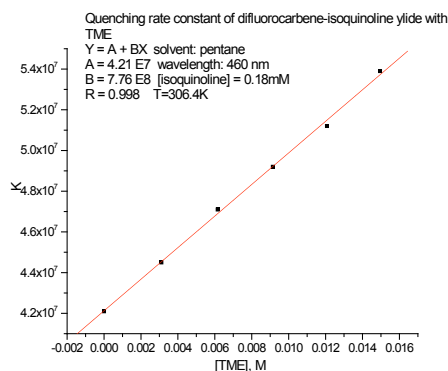

**Figure S-28.** Rate constant for addition of  $CF_2$  to TME at 306.4 K:  $k = 7.76 \exp 8 \text{ M}^{-1} \text{ s}^{-1}$ ,  $R = 0.998$ .

## Additional rate constant determinations

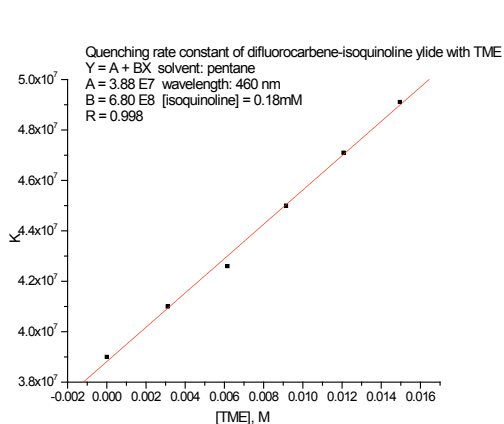

**Figure S-29.** Rate constant for addition of  $\text{CF}_2$  to TME at 297 K:  $k = 6.80 \exp 8 \text{ M}^{-1}\text{s}^{-1}$ ,  $R = 0.998$ .

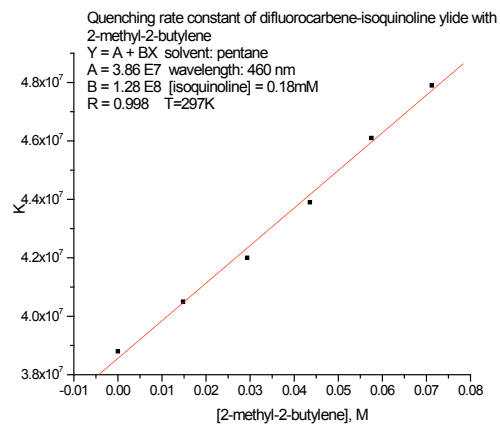

**Figure S-30.** Rate constant for addition of  $\text{CF}_2$  to 2-methyl-2-butene at 297 K:  $k = 1.28 \exp 8 \text{ M}^{-1}\text{s}^{-1}$ ,  $R = 0.998$ .

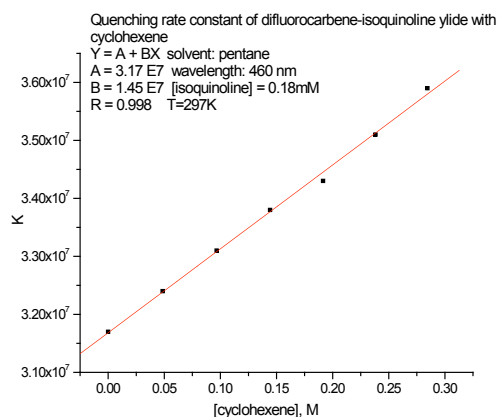

**Figure S-31.** Rate constant for addition of  $\text{CF}_2$  to cyclohexene at 297 K:  $k = 1.45 \exp 7 \text{ M}^{-1}\text{s}^{-1}$ ,  $R = 0.998$ .

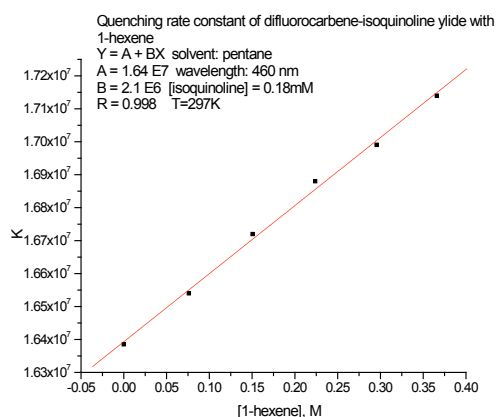

**Figure S-32.** Rate constant for addition of  $\text{CF}_2$  to 1-hexene at 297 K:  $k = 2.10 \exp 6 \text{ M}^{-1}\text{s}^{-1}$ ,  $R = 0.998$ .

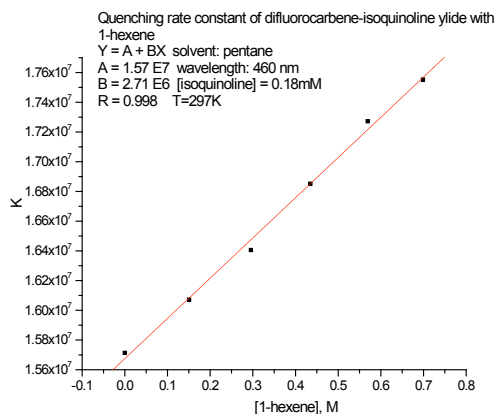

**Figure S-33.** Rate constant for addition of  $\text{CF}_2$  to 1-hexene at 297 K:  $k = 2.71 \exp 6 \text{ M}^{-1}\text{s}^{-1}$ ,  $R = 0.998$ .

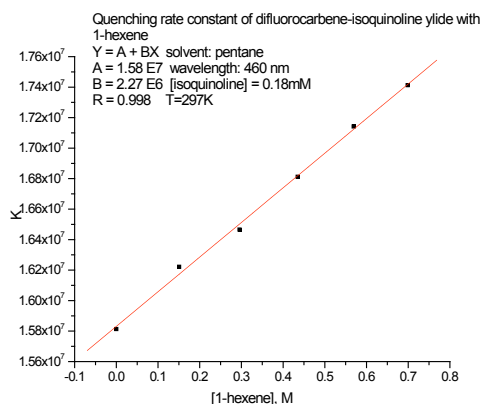

**Figure S-34.** Rate constant for addition of  $\text{CF}_2$  to 1-hexene at 297 K:  $k = 2.27 \exp 6 \text{ M}^{-1}\text{s}^{-1}$ ,  $R = 0.998$ .

## Computational details

Electronic structure calculations, based on density functional theory (DFT), were carried out with the Gaussian 03 suite<sup>1</sup> of programs. We employed both the PBE and B3LYP exchange and correlation functionals<sup>2,3</sup> with 6-311+G(d) basis sets.<sup>4</sup> The PBE functionals were used in ground state geometry optimizations (PBEPBE/6-311+G(d)), whereas excited state properties (transition energies ( $\lambda$ ) and oscillator strengths ( $f$ )) were calculated at the optimized ground state geometries using time-dependent density functional theory and the B3LYP functionals (TD-B3LYP/6-311+G(d))/PBEPBE/6-311+G(d)).<sup>5</sup> General solvent effects were incorporated with the polarizable conductor self-consistent reaction field model (CPCM).<sup>6</sup> Solute molecular cavities were generated using explicit hydrogen atoms and Pauling atomic radii. The hydrocarbon solvent used experimentally (pentane) was simulated with heptane parameters.

(1) Gaussian 03, Revision C.02. Frisch, M. J.; Trucks, G. W.; Schlegel, H. B.; Scuseria, G. E.; Robb, M. A.; Cheeseman, J. R.; Montgomery, Jr., J. A.; Vreven, T.; Kudin, K. N.; Burant, J. C.; Millam, J. M.; Iyengar, S. S.; Tomasi, J.; Barone, V.; Mennucci, B.; Cossi, M.; Scalmani, G.; Rega, N.; Petersson, G. A.; Nakatsuji, H.; Hada, M.; Ehara, M.; Toyota, K.; Fukuda, R.; Hasegawa, J.; Ishida, M.; Nakajima, T.; Honda, Y.; Kitao, O.;

Nakai, H.; Klene, M.; Li, X.; Knox, J. E.; Hratchian, H. P.; Cross, J. B.; Bakken, V.; Adamo, C.; Jaramillo, J.; Gomperts, R.; Stratmann, R. E.; Yazyev, O.; Austin, A. J.; Cammi, R.; Pomelli, C.; Ochterski, J. W.; Ayala, P. Y.; Morokuma, K.; Voth, G. A.; Salvador, P.; Dannenberg, J. J.; Zakrzewski, V. G.; Dapprich, S.; Daniels, A. D.; Strain, M. C.; Farkas, O.; Malick, D. K.; Rabuck, A. D.; Raghavachari, K.; Foresman, J. B.; Ortiz, J. V.; Cui, Q.; Baboul, A. G.; Clifford, S.; Cioslowski, J.; Stefanov, B. B.; Liu, G.; Liashenko, A.; Piskorz, P.; Komaromi, I.; Martin, R. L.; Fox, D. J.; Keith, T.; Al-Laham, M. A.; Peng, C. Y.; Nanayakkara, A.; Challacombe, M.; Gill, P. M. W.; Johnson, B.; Chen, W.; Wong, M. W.; Gonzalez, C.; and Pople, J. A.; Gaussian, Inc., Wallingford CT, 2004.

(2) Perdew, J.P.; Burke, K.; Ernzerhof, M. *Phys. Rev. Lett.* **1996**, *77*, 3865.

(3) Becke, A.D. *J. Chem. Phys.* **1993**, *98*, 5648; Lee, C.; Yang, W.; Parr, R.G. *Phys. Rev. B.* **1988**, *37*, 785.

(4) Ditchfield, R.; Hehre, W.J.; Pople, J.A. *J. Chem. Phys.* **1971**, *54*, 721. Hariharan, P.C.; Pople, J.A. *Mol. Phys.* **1974**, *27*, 209. Krishnan, R.; Binkley, J.S.; Seeger, R.; Pople, J.A. *J. Chem. Phys.* **1980**, *72*, 650. McLean, A.D.; Chandler, G.S. *J. Chem. Phys.* **1980**, *72*, 5639. Clark, T.; Chandrasekhar, J.; Spitznagel, G.W.; Schleyer, P.v.R. *J. Comp. Chem.* **1983**, *4*, 294.

(5) Casida, M.E.; Jamorski, C.; Casida, K.C.; Salahub, D.R. *J. Chem. Phys.* **1998**, *108*, 4439.

(6) Cossi, M.; Barone, V. *J. Phys. Chem. A* **1998**, *102*, 1995.

**Optimized ground state cartesian geometries (Å), absolute energies (a.u.), and excited state transition energies and intensities.**

**PBEPBE/6-311+G(d) geometry optimization data for CF<sub>2</sub>**

C,0,-0.4967270355,0.,-0.3512390552

F,0,-0.4378742798,0.,0.9704868003

F,0,0.7690256368,0.,-0.7363274301

SCF Done: E(RPBE-PBE) = -237.544581731 A.U. after 1 cycles

|                                              |                             |
|----------------------------------------------|-----------------------------|
| Zero-point correction=                       | 0.006419 (Hartree/Particle) |
| Thermal correction to Energy=                | 0.009445                    |
| Thermal correction to Enthalpy=              | 0.010390                    |
| Thermal correction to Gibbs Free Energy=     | -0.017032                   |
| Sum of electronic and zero-point Energies=   | -237.538163                 |
| Sum of electronic and thermal Energies=      | -237.535136                 |
| Sum of electronic and thermal Enthalpies=    | -237.534192                 |
| Sum of electronic and thermal Free Energies= | -237.561614                 |

**TD-B3LYP/6-311+G(d)//PBEPBE/6-311+G(d), excited state data, CF<sub>2</sub> in vacuum**

|                             |           |           |          |
|-----------------------------|-----------|-----------|----------|
| Excited State 1: Singlet-B1 | 4.7091 eV | 263.29 nm | f=0.0344 |
| 12 -> 13                    | 0.61517   |           |          |
| Excited State 2: Singlet-A2 | 7.7300 eV | 160.39 nm | f=0.0000 |
| 11 -> 13                    | 0.70111   |           |          |
| Excited State 3: Singlet-A1 | 8.7174 eV | 142.23 nm | f=0.0383 |
| 12 -> 14                    | 0.68401   |           |          |
| 12 -> 16                    | -0.11434  |           |          |

**TD-B3LYP/6-311+G(d)//PBEPBE/6-311+G(d), excited state data, CPCM: CF<sub>2</sub> in heptane solvent**

|                             |           |           |          |
|-----------------------------|-----------|-----------|----------|
| Excited State 1: Singlet-B1 | 4.6284 eV | 267.88 nm | f=0.0431 |
| 12 -> 13                    | 0.63200   |           |          |
| Excited State 2: Singlet-A2 | 7.8028 eV | 158.90 nm | f=0.0000 |
| 11 -> 13                    | 0.70139   |           |          |
| Excited State 3: Singlet-A1 | 8.6687 eV | 143.03 nm | f=0.0585 |
| 12 -> 14                    | 0.67788   |           |          |
| 12 -> 16                    | -0.16492  |           |          |

**PBEPBE/6-311+G(d) geometry optimization data for pyridine (C<sub>5</sub>H<sub>5</sub>N)**

C,0,-1.1419440583,0.0520198395,0.4600399661  
C,0,-1.1904302152,0.0254282003,1.859181448  
C,0,0.0154401917,0.0000552446,2.5666785219  
C,0,1.2129790637,0.0019946294,1.844702181  
C,0,1.1481883101,0.0296927106,0.4462592326  
N,0,-0.0009834306,0.0550449207,-0.2505972432  
H,0,-2.0682365279,0.072151596,-0.1262730587  
H,0,-2.1528710931,0.0244033284,2.378022112  
H,0,2.1813835701,-0.0178623082,2.3519386996  
H,0,2.0675573841,0.0318358723,-0.1511831587  
H,0,0.0218271273,-0.0216824926,3.6603699464

SCF Done: E(RPBE-PBE) = -248.023283559 A.U. after 1 cycles

|                                              |                             |
|----------------------------------------------|-----------------------------|
| Zero-point correction=                       | 0.086054 (Hartree/Particle) |
| Thermal correction to Energy=                | 0.090476                    |
| Thermal correction to Enthalpy=              | 0.091420                    |
| Thermal correction to Gibbs Free Energy=     | 0.058569                    |
| Sum of electronic and zero-point Energies=   | -247.937229                 |
| Sum of electronic and thermal Energies=      | -247.932807                 |
| Sum of electronic and thermal Enthalpies=    | -247.931863                 |
| Sum of electronic and thermal Free Energies= | -247.964715                 |

**TD-B3LYP/6-311+G(d)//PBEPBE/6-311+G(d), excited state data, CPCM: pyridine (C<sub>5</sub>H<sub>5</sub>N) in heptane solvent**

|                            |           |           |          |
|----------------------------|-----------|-----------|----------|
| Excited State 1: Singlet-A | 4.9354 eV | 251.22 nm | f=0.0062 |
| 20 -> 22                   | 0.68675   |           |          |
| Excited State 2: Singlet-A | 5.3088 eV | 233.54 nm | f=0.0000 |
| 20 -> 23                   | 0.70465   |           |          |
| Excited State 3: Singlet-A | 5.3699 eV | 230.89 nm | f=0.0838 |
| 19 -> 23                   | 0.32887   |           |          |
| 21 -> 22                   | 0.62232   |           |          |
| Excited State 4: Singlet-A | 6.1127 eV | 202.83 nm | f=0.0349 |
| 19 -> 22                   | -0.37504  |           |          |
| 21 -> 23                   | 0.55759   |           |          |

**PBEPBE/6-311+G(d) geometry optimization data for isoquinoline (C<sub>9</sub>H<sub>7</sub>N)**

C,0,-0.7002310227,0.0118292639,-0.6513703308  
C,0,-0.7398731633,0.059631584,0.7723359505  
C,0,0.5132426194,0.0778127419,1.4712030775  
C,0,1.6950483043,0.0468841786,0.6830494572  
C,0,1.592757682,0.0017419184,-0.69412192  
H,0,-2.9058626203,0.0753512436,0.9661509596  
H,0,-1.6470661218,-0.0025835839,-1.2086557395

C,0,-1.9547479689,0.0894654056,1.5082039082  
C,0,0.5053132391,0.1253186526,2.8925197476  
H,0,2.6772309085,0.0588599768,1.1658679675  
H,0,2.4912480629,-0.0226148907,-1.3198390761  
C,0,-0.692575204,0.1534020594,3.5833630636  
C,0,-1.9312384637,0.1355119097,2.8898285083  
H,0,1.4580527961,0.1393305305,3.4310872916  
H,0,-0.6897771583,0.1899231081,4.6765896737

H,0,-2.8669651716,0.1584060898,3.4552920817  
N,0,0.4081964568,-0.016510494,-1.3736750522

SCF Done: E(RPBE-PBE) = -401.504943495 A.U. after 2 cycles

|                                              |                             |
|----------------------------------------------|-----------------------------|
| Zero-point correction=                       | 0.131547 (Hartree/Particle) |
| Thermal correction to Energy=                | 0.138509                    |
| Thermal correction to Enthalpy=              | 0.139454                    |
| Thermal correction to Gibbs Free Energy=     | 0.100178                    |
| Sum of electronic and zero-point Energies=   | -401.373397                 |
| Sum of electronic and thermal Energies=      | -401.366434                 |
| Sum of electronic and thermal Enthalpies=    | -401.365490                 |
| Sum of electronic and thermal Free Energies= | -401.404765                 |

**TD-B3LYP/6-311+G(d)//PBEPBE/6-311+G(d), Excited State Data, CPCM:  
isoquinoline (C<sub>9</sub>H<sub>7</sub>N) in heptane solvent**

|                            |           |           |          |
|----------------------------|-----------|-----------|----------|
| Excited State 1: Singlet-A | 4.1506 eV | 298.72 nm | f=0.1048 |
| 32 -> 35                   | 0.10982   |           |          |
| 32 -> 36                   | 0.15788   |           |          |
| 34 -> 35                   | 0.63374   |           |          |
| 34 -> 36                   | -0.14136  |           |          |
| Excited State 2: Singlet-A | 4.4624 eV | 277.84 nm | f=0.0019 |
| 33 -> 35                   | 0.68842   |           |          |
| Excited State 3: Singlet-A | 4.5478 eV | 272.63 nm | f=0.0248 |
| 32 -> 35                   | -0.44342  |           |          |
| 34 -> 35                   | 0.15594   |           |          |
| 34 -> 36                   | 0.52620   |           |          |
| Excited State 4: Singlet-A | 5.2312 eV | 237.01 nm | f=0.0016 |
| 33 -> 36                   | 0.69363   |           |          |

**PBEPBE/6-311+G(d) Geometry Optimization Data for thioanisole (C<sub>7</sub>H<sub>8</sub>S)**

C,0,1.2896422828,-0.7138650119,-1.1102425822  
C,0,2.5373788894,-1.1938893215,-0.7101301165  
C,0,3.2077701487,-0.6171533065,0.3779064483  
C,0,2.6105789318,0.4471739405,1.0593683596

C,0,1.3581959973,0.9378423723,0.667018549  
C,0,0.6861562113,0.3597192243,-0.4236317848  
H,0,0.7753453314,-1.1716417217,-1.9609758369  
H,0,2.9899006692,-2.0276265663,-1.2550007395  
H,0,4.185086324,-0.9952945318,0.6890647382

H,0,3.1200712968,0.9087666351,1.9105913358  
H,0,0.9171919081,1.7703676678,1.218939855  
S,0,-0.9048895448,0.8880830481,-1.0214622592  
C,0,-1.3429802761,2.2560279059,0.0925605786  
H,0,-2.3256055119,2.6082515537,-0.2495186251  
H,0,-1.4351505543,1.9216685365,1.1357246109  
H,0,-0.6285691039,3.0884125754,0.0202554688

SCF Done: E(RPBE-PBE) = -669.281787524 A.U. after 1 cycles

Zero-point correction= 0.125460 (Hartree/Particle)  
Thermal correction to Energy= 0.133291  
Thermal correction to Enthalpy= 0.134235  
Thermal correction to Gibbs Free Energy= 0.092412  
Sum of electronic and zero-point Energies= -669.156328  
Sum of electronic and thermal Energies= -669.148497  
Sum of electronic and thermal Enthalpies= -669.147552  
Sum of electronic and thermal Free Energies= -669.189375

**TD-B3LYP/6-311+G(d)//PBEPBE/6-311+G(d), excited state data, CPCM:  
thioanisole in heptane solvent**

Excited State 1: Singlet-A 4.5755 eV 270.97 nm f=0.0317  
32 -> 34 -0.10890  
32 -> 35 0.19616  
33 -> 34 0.62702  
33 -> 35 0.22297  
Excited State 2: Singlet-A 4.8785 eV 254.14 nm f=0.3382  
32 -> 34 -0.13296  
33 -> 34 -0.22869  
33 -> 35 0.61593  
Excited State 3: Singlet-A 4.9680 eV 249.57 nm f=0.0002  
33 -> 36 0.65720  
33 -> 37 -0.20209  
Excited State 4: Singlet-A 5.2894 eV 234.40 nm f=0.0052  
33 -> 36 0.22603  
33 -> 37 0.64263  
33 -> 39 0.11641

**PBEPBE/6-311+G(d) geometry optimization data for CF<sub>2</sub>:pyridine ylide**

C,0,-1.1868698139,0.047882808,0.4719382349  
C,0,-1.187594969,0.0242724876,1.8535997933  
C,0,0.0156399902,0.0138491102,2.5755258015



C,0,1.2102176753,0.0008190619,1.8390825617  
 C,0,1.1932685666,0.0247136418,0.4577249198  
 N,0,-0.0006184202,0.0927007009,-0.2401084375  
 H,0,-2.0918114656,0.0640781093,-0.130968264  
 H,0,-2.1529574702,-0.0016025487,2.3641913876  
 H,0,2.1809108076,-0.0440243474,2.3381159484  
 H,0,2.0908359221,0.0235007024,-0.1563017879  
 C,0,-0.0059832424,0.376302305,-1.6323669948  
 H,0,0.021889499,0.0068918149,3.6663384893  
 F,0,-1.1275596465,-0.1899610496,-2.2040717676  
 F,0,1.0968254697,-0.2127928531,-2.217444078

SCF Done: E(RPBE-PBE) = -485.594964624 A.U. after 1 cycles

|                                              |                             |
|----------------------------------------------|-----------------------------|
| Zero-point correction=                       | 0.096616 (Hartree/Particle) |
| Thermal correction to Energy=                | 0.104056                    |
| Thermal correction to Enthalpy=              | 0.105000                    |
| Thermal correction to Gibbs Free Energy=     | 0.064457                    |
| Sum of electronic and zero-point Energies=   | -485.498349                 |
| Sum of electronic and thermal Energies=      | -485.490909                 |
| Sum of electronic and thermal Enthalpies=    | -485.489965                 |
| Sum of electronic and thermal Free Energies= | -485.530507                 |

**TD-B3LYP/6-311+G(d)//PBEPBE/6-311+G(d), excited state data, CPCM:**

**CF<sub>2</sub>:pyridine ylide in heptane solvent**

|                            |           |           |          |
|----------------------------|-----------|-----------|----------|
| Excited State 1: Singlet-A | 2.9411 eV | 421.56 nm | f=0.3283 |
| 33 -> 34                   | 0.58665   |           |          |
| Excited State 2: Singlet-A | 3.1422 eV | 394.57 nm | f=0.0103 |
| 32 -> 34                   | -0.12428  |           |          |
| 33 -> 35                   | 0.68725   |           |          |
| Excited State 3: Singlet-A | 4.5952 eV | 269.81 nm | f=0.0174 |
| 33 -> 36                   | 0.69942   |           |          |
| Excited State 4: Singlet-A | 5.0843 eV | 243.86 nm | f=0.0035 |
| 32 -> 34                   | -0.11252  |           |          |
| 33 -> 37                   | 0.68692   |           |          |
| 33 -> 40                   | -0.11735  |           |          |
| Excited State 5: Singlet-A | 5.2984 eV | 234.00 nm | f=0.1526 |
| 31 -> 35                   | -0.18245  |           |          |
| 32 -> 34                   | 0.63301   |           |          |
| 33 -> 37                   | 0.12936   |           |          |

**PBEPBE/6-311+G(d) geometry optimization data for CF<sub>2</sub>:isoquinoline ylide**

C,0,-0.7430587934,-0.0028882821,-0.6433241671  
C,0,-0.7474406093,0.0677615781,0.7624309437  
C,0,0.5028300819,0.083942131,1.4720142917  
C,0,1.6913274401,0.0345434944,0.6801832551  
C,0,1.6398084598,0.0085896388,-0.6809962511  
H,0,-2.9161154141,0.0765780578,0.9781470043  
H,0,-1.6600651362,-0.0278085392,-1.2288888216  
C,0,-1.9601596492,0.0918515103,1.5098701987  
C,0,0.5037738671,0.1344180492,2.8832624151  
H,0,2.6713569721,0.0140354495,1.1639610557  
H,0,2.5191369535,-0.0048841497,-1.3213025424  
C,0,-0.6926846863,0.1592277763,3.5881534281  
C,0,-1.9262039564,0.1345207792,2.8929815745  
H,0,1.4604471761,0.1485084751,3.4148449988  
H,0,-0.6850878315,0.1940751276,4.6805449621  
H,0,-2.8631243096,0.152333314,3.4566974124  
N,0,0.4180126099,0.0169552838,-1.3607501895  
C,0,0.439117203,0.2434043041,-2.7690264388  
F,0,-0.7493161811,-0.1994873331,-3.3067389862  
F,0,1.4497058673,-0.5120405112,-3.3368219296

SCF Done: E(RPBE-PBE) = -639.078490637 A.U. after 2 cycles

|                                              |                             |
|----------------------------------------------|-----------------------------|
| Zero-point correction=                       | 0.142070 (Hartree/Particle) |
| Thermal correction to Energy=                | 0.152183                    |
| Thermal correction to Enthalpy=              | 0.153127                    |
| Thermal correction to Gibbs Free Energy=     | 0.106264                    |
| Sum of electronic and zero-point Energies=   | -638.936420                 |
| Sum of electronic and thermal Energies=      | -638.926308                 |
| Sum of electronic and thermal Enthalpies=    | -638.925364                 |
| Sum of electronic and thermal Free Energies= | -638.972227                 |

**TD-B3LYP/6-311+G(d)//PBEPBE/6-311+G(d), excited state data, CPCM:**

**CF<sub>2</sub>:isoquinoline ylide in heptane solvent**

|                            |           |           |          |
|----------------------------|-----------|-----------|----------|
| Excited State 1: Singlet-A | 2.5957 eV | 477.64 nm | f=0.2123 |
| 46 -> 47                   | 0.53029   |           |          |
| 46 -> 48                   | -0.35188  |           |          |
| Excited State 2: Singlet-A | 2.9142 eV | 425.44 nm | f=0.2681 |
| 46 -> 47                   | 0.26647   |           |          |
| 46 -> 48                   | 0.58693   |           |          |
| Excited State 3: Singlet-A | 4.0146 eV | 308.83 nm | f=0.1072 |
| 44 -> 48                   | 0.12524   |           |          |
| 45 -> 47                   | 0.65749   |           |          |

|                  |           |           |           |          |
|------------------|-----------|-----------|-----------|----------|
| Excited State 4: | Singlet-A | 4.1006 eV | 302.35 nm | f=0.0027 |
| 46 -> 49         |           | 0.68873   |           |          |
| Excited State 5: | Singlet-A | 4.6305 eV | 267.75 nm | f=0.0060 |
| 46 -> 50         |           | 0.68233   |           |          |
| 46 -> 52         |           | -0.13448  |           |          |

The isoquinoline-CF<sub>2</sub> ylide has an intense transition computed at 478 nm and a second transition at 425 nm of similar intensity. Together, they should yield a strong (broad) absorption around 450 nm. The overall intensity should be  $\sim(0.212 + 0.268) \sim 0.48$ .

#### **PBEPBE/6-311+G(d) Geometry Optimization Data for CF<sub>2</sub>:thioanisole ylide**

```

C,0,-1.0667449118,-1.0778281341,1.3785048171
C,0,-0.9426295027,-0.9056652084,2.7596968291
C,0,0.2329866052,-0.37227472,3.3032928403
C,0,1.2815286943,-0.0004999908,2.4544091357
C,0,1.1639509805,-0.1538589605,1.068293629
C,0,-0.0100404906,-0.7041233509,0.5295446556
H,0,-1.9783168234,-1.5106199156,0.9565034985
H,0,-1.7671383289,-1.2009288976,3.4146677486
H,0,0.3305022175,-0.2462948313,4.3848969871
H,0,2.1992768986,0.4254705874,2.8698892963
H,0,1.9769812683,0.1683112204,0.4150913727
S,0,-0.2787526356,-0.8884828025,-1.2235874969
C,0,1.4006063335,-1.0852859646,-1.8896736353
H,0,1.2787949597,-1.4125582969,-2.9309815011
H,0,1.9275554654,-0.1207753,-1.8735971558
H,0,1.9468721366,-1.8539248611,-1.3278426834
C,0,-0.0220799525,1.6638717328,-1.6644560505
F,0,-0.5455967576,1.7920476338,-2.9055257967
F,0,-0.9743979268,2.1836226677,-0.8687965297

```

SCF Done: E(RPBE-PBE) = -906.835193726 A.U. after 2 cycles

|                                              |                             |
|----------------------------------------------|-----------------------------|
| Zero-point correction=                       | 0.133361 (Hartree/Particle) |
| Thermal correction to Energy=                | 0.145612                    |
| Thermal correction to Enthalpy=              | 0.146556                    |
| Thermal correction to Gibbs Free Energy=     | 0.092286                    |
| Sum of electronic and zero-point Energies=   | -906.701833                 |
| Sum of electronic and thermal Energies=      | -906.689582                 |
| Sum of electronic and thermal Enthalpies=    | -906.688638                 |
| Sum of electronic and thermal Free Energies= | -906.742907                 |

**TD-B3LYP/6-311+G(d)//PBEPBE/6-311+G(d), excited state data, CPCM:  
CF<sub>2</sub>:thioanisole ylide in heptane solvent**

|                            |           |           |          |
|----------------------------|-----------|-----------|----------|
| Excited State 1: Singlet-A | 3.7778 eV | 328.19 nm | f=0.3266 |
| 45 -> 46                   | 0.63662   |           |          |
| Excited State 2: Singlet-A | 4.6252 eV | 268.06 nm | f=0.0007 |
| 44 -> 46                   | 0.56609   |           |          |
| 45 -> 47                   | -0.31758  |           |          |
| 45 -> 48                   | -0.25635  |           |          |
| Excited State 3: Singlet-A | 4.7660 eV | 260.14 nm | f=0.0297 |
| 43 -> 46                   | 0.44743   |           |          |
| 44 -> 46                   | 0.25900   |           |          |
| 45 -> 47                   | 0.42411   |           |          |
